# Supplementary material for: A Systematic Review on Processed/Ultra-Processed Foods and Arterial Hypertension in Adults and Older People
Source: MDPI journal article supplement (doi:10.3390/nu14061215), 2022-03-13
Supplement: s1 [file s1]

Supplementary Materials

Table S1. PICOS acronym used in the design of the study (n = 9).

| Acronym          | Description                                                                              |
|------------------|------------------------------------------------------------------------------------------|
| P (Population)   | Adults (20 to 59 years of age) and/or older people (60 years of age or older)            |
| I (Intervention) | High consumption of processed and ultra-processed foods based on the NOVA classification |
| C (Control)      | Low consumption of processed and ultra-processed foods based on the NOVA classification  |
| O (Outcome)      | Arterial hypertension defined based on any diagnostic criteria                           |
| S (Study design) | Observational (cohort, case-control and cross-sectional) and intervention studies        |

Table S2. Methodological quality of studies selected for present review (n = 9).

| Modified Newcastle Ottawa         | Selection |   |   |     | Comparability | Outcome |   |   | Total |       |       |       | Classification |
|-----------------------------------|-----------|---|---|-----|---------------|---------|---|---|-------|-------|-------|-------|----------------|
| item                              | 1         | 2 | 3 | 4   | 1             | 1       | 2 |   |       |       |       |       |                |
| Conceição et al. (2018) [19]      | ☆         | ☆ | - | ☆☆☆ | -             | -       | ☆ |   | ☆☆☆☆☆ | ☆☆☆☆☆ | ☆☆☆☆☆ | ☆☆☆☆☆ | Good           |
| Smiljanec et al. (2020) [21]      | -         | - | - | ☆☆☆ | ☆             | -       | ☆ |   | ☆☆☆☆☆ | ☆☆☆☆☆ | ☆☆☆☆☆ | ☆☆☆☆☆ | Fair           |
| Martinez-Peres et al. (2021) [24] | ☆         | ☆ | ☆ | ☆☆☆ | ☆             | -       | ☆ |   | ☆☆☆☆☆ | ☆☆☆☆☆ | ☆☆☆☆☆ | ☆☆☆☆☆ | Good           |
| Nardocci et al. (2020) [3]        | ☆         | ☆ | ☆ | ☆☆☆ | ☆             | -       | ☆ |   | ☆☆☆☆☆ | ☆☆☆☆☆ | ☆☆☆☆☆ | ☆☆☆☆☆ | Good           |
| Martínez-Steele et al (2019) [22] | ☆         | ☆ | ☆ | ☆☆☆ | ☆             | -       | ☆ |   | ☆☆☆☆☆ | ☆☆☆☆☆ | ☆☆☆☆☆ | ☆☆☆☆☆ | Good           |
| Newcastle-Ottawa                  | Selection |   |   |     | Comparability | Outcome |   |   | Total |       |       |       | Classification |
| item                              | 1         | 2 | 3 | 4   | 1             | 1       | 2 | 3 |       |       |       |       |                |
| Rezende-Alves et al. (2020) [2]   | ☆         | ☆ | ☆ | ☆   | ☆             | -       | ☆ | ☆ | ☆☆☆☆☆ | ☆☆☆☆☆ | ☆☆☆☆☆ | ☆☆☆☆☆ | Good           |
| Monge et al. (2021) [23]          | -         | ☆ | ☆ | ☆   | ☆             | -       | ☆ | ☆ | ☆☆☆☆☆ | ☆☆☆☆☆ | ☆☆☆☆☆ | ☆☆☆☆☆ | Good           |
| Mendonça et al. (2017) [1]        | ☆         | ☆ | ☆ | ☆   | ☆             | -       | ☆ | ☆ | ☆☆☆☆☆ | ☆☆☆☆☆ | ☆☆☆☆☆ | ☆☆☆☆☆ | Good           |
| Scaranni et al. (2021) [20]       | ☆         | ☆ | ☆ | ☆   | ☆             | -       | ☆ | ☆ | ☆☆☆☆☆ | ☆☆☆☆☆ | ☆☆☆☆☆ | ☆☆☆☆☆ | Good           |
